# Supplementary material for: A Novel Fatty Acid Metabolism-Associated Risk Model for Prognosis Prediction in Acute Myeloid Leukaemia
Source: MDPI journal article supplement (doi:10.3390/curroncol30020193), 2023-02-20
Supplement: s1 [file s1]

# Supplementary Materials

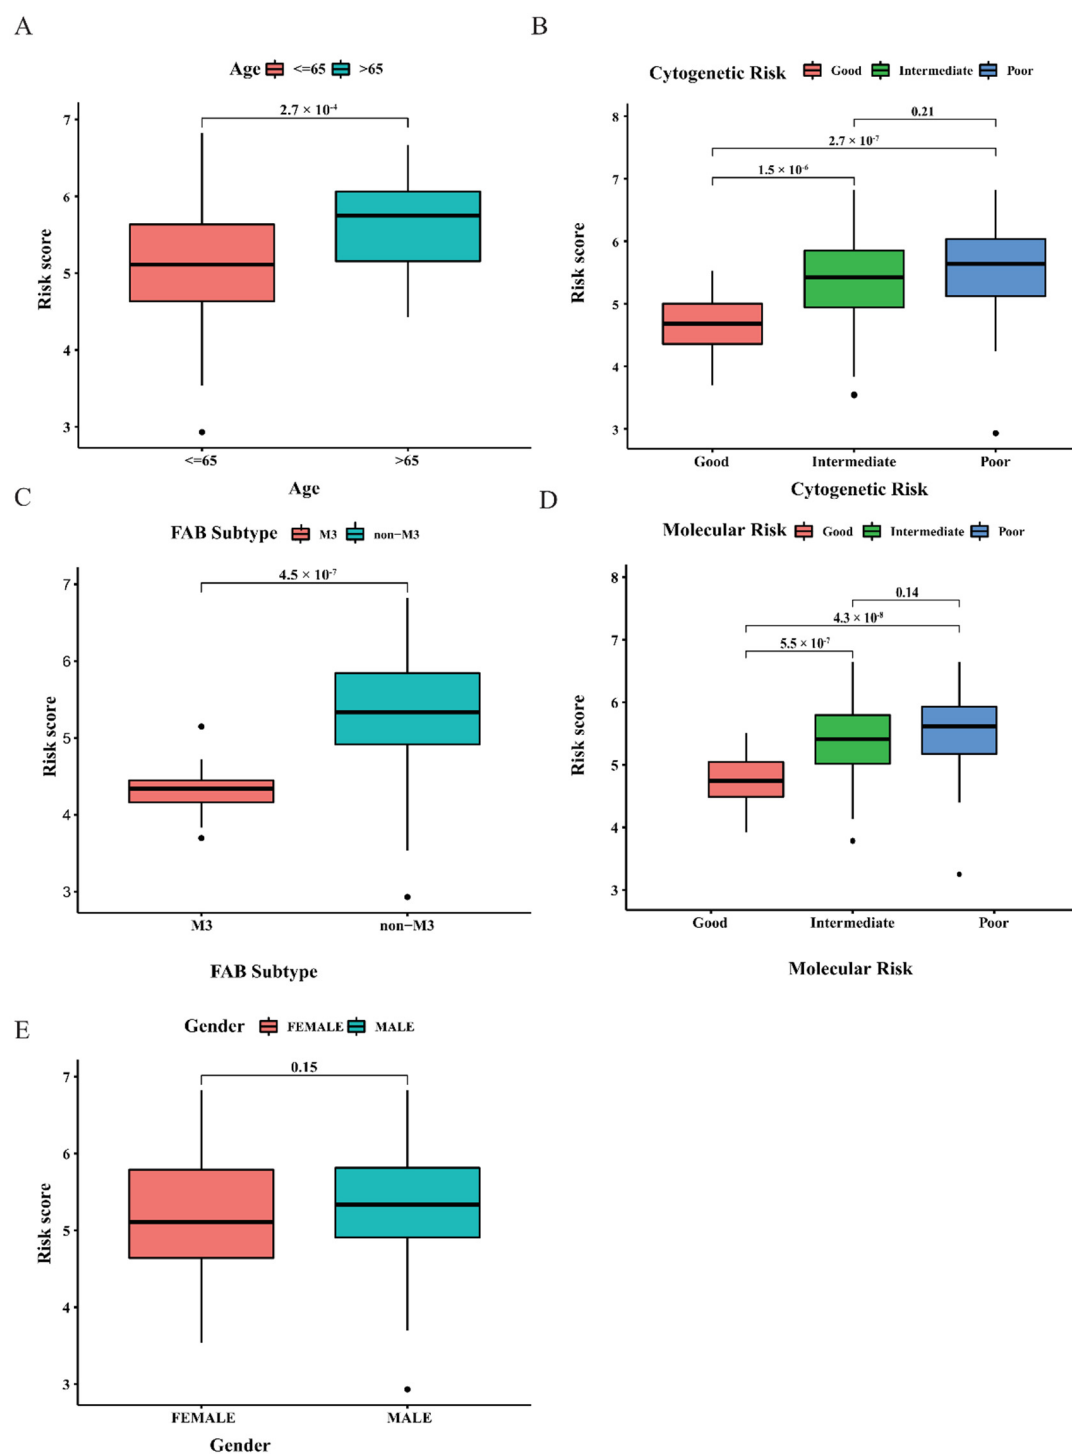

**Figure S1.** Correlation between the risk score and clinicopathological characteristics in the TCGA cohort. (A-E) Age, cytogenetic risk, FAB subtype, molecular risk and gender.

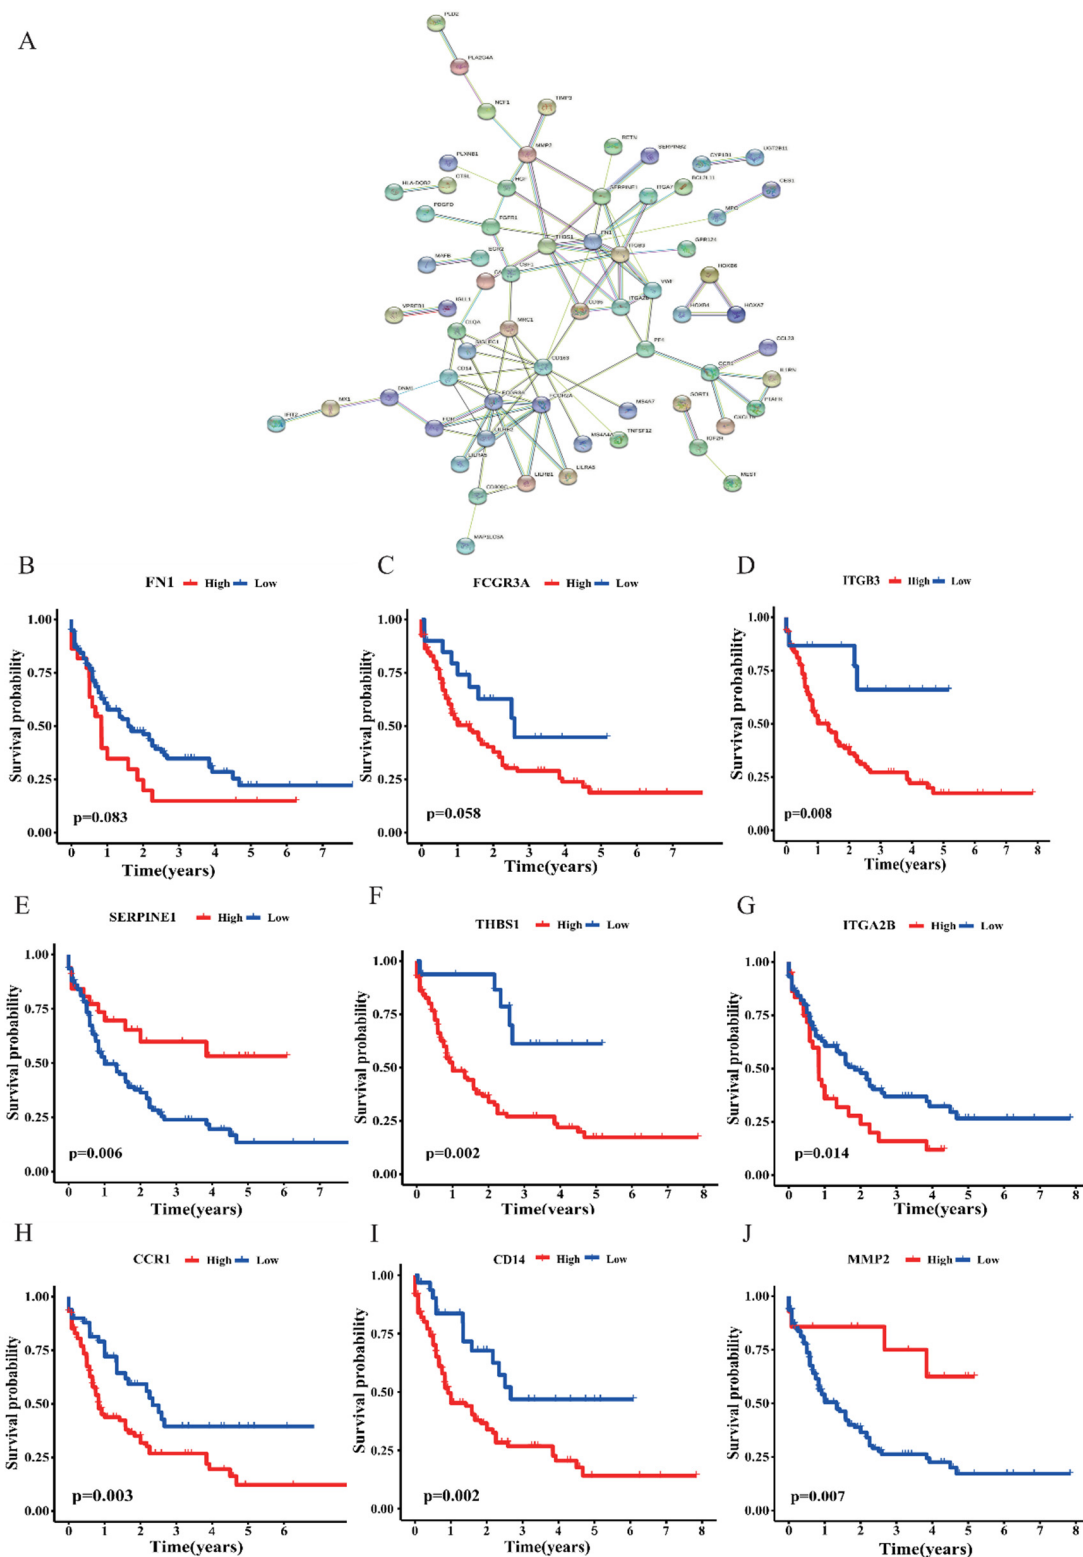

**Figure S2.** Construction of the protein–protein interaction (PPI) network and prognostic value of the top 10 hub genes. (A) PPI network of DEGs between the low- and high-risk score groups. (B–J) Survival analysis for AML patients with high or low FN1 (B), FCGR3A (C), ITGB3 (D), SERPINE1 (E), THBS1 (F), ITGA2B (G), CCR1 (H), CD14 (I), and MMP2 (J).

**Table S1.** The primer sequences of genes.

|         | Forward Primers                 | Reverse Primers                |
|---------|---------------------------------|--------------------------------|
| UROD    | 5'- CGACACTTGGAGGTTCAACAATAA-3' | 5'- CACCACCCTCAACCATGTATGT-3'  |
| PCTP    | 5'- CACCACCCTCAACCATGTATGT-3'   | 5'- CACCACCCTCAACCATGTATGT-3'  |
| PLA2G4A | 5'- CACCACCCTCAACCATGTATGT-3'   | 5'- ATCACTCACCAAGGCCATTATCA-3' |
| EPHX2   | 5'- GGATTTCCCGAGAGTTGGTATTC-3'  | 5'- GCTTGAGAGAGGCCCGAGTTTAT-3' |
| GAPDH   | 5'-GTCTCCTCTGACTTCAACAGCG-3'    | 5'-ACCACCCTGTTGCTGTAGCCAA-3'   |
